# Supplementary material for: Variation in the Use of Active Surveillance for Low-Risk Prostate Cancer Across US Census Regions
Source: PubMed Central journal article supplement (PMC8170083; doi:10.3389/fonc.2021.644885), 2021-05-19
Supplement: Data_Sheet_3.pdf [file Data_Sheet_3.pdf]

**Supplemental Table 3: Multivariable logistic regression analysis assessing receipt of active surveillance accounting for the interactions between socioeconomic status and race.**

|                                    | West             | P value | Northeast        | P value | South            | P value | Midwest          | P value |
|------------------------------------|------------------|---------|------------------|---------|------------------|---------|------------------|---------|
| <b>Race and SES interactions</b>   |                  |         |                  |         |                  |         |                  |         |
| <b>Race in high SES</b>            |                  |         |                  |         |                  |         |                  |         |
| White                              | Reference        |         | Reference        |         | Reference        |         | Reference        |         |
| Black                              | 1.37 (1.20-1.56) | <.0001  | 0.87 (0.75-1.01) | 0.0755  | 0.97 (0.80-1.18) | 0.7755  | 1.71 (1.20-2.44) | 0.0032  |
| Other/Unknown                      | 0.93 (0.84-1.03) | 0.1837  | 1.19 (0.97-1.47) | 0.0973  | 0.99 (0.54-1.83) | 0.9759  | 1.51 (0.70-3.27) | 0.2941  |
| <b>Race in low SES</b>             |                  |         |                  |         |                  |         |                  |         |
| White                              | Reference        |         | Reference        |         | Reference        |         | Reference        |         |
| Black                              | 1.37 (1.21-1.55) | <.0001  | 0.51 (0.36-0.73) | 0.0003  | 1.12 (1.00-1.25) | 0.0497  | 1.59 (1.29-1.96) | <.0001  |
| Other/Unknown                      | 1.47 (1.28-1.69) | <.0001  | 1.17 (0.70-1.93) | 0.5505  | 2.63 (1.62-4.26) | <.0001  | 1.13 (0.58-2.19) | 0.7243  |
| <b>SES</b>                         |                  |         |                  |         |                  |         |                  |         |
| high vs. low in White              | 1.54 (1.45-1.63) | <.0001  | 1.43 (1.21-1.68) | <.0001  | 1.31 (1.17-1.46) | <.0001  | 0.83 (0.70-0.98) | 0.0297  |
| high vs. low in Black              | 1.53 (1.30-1.81) | <.0001  | 2.42 (1.70-3.46) | <.0001  | 1.14 (0.94-1.37) | 0.1894  | 0.89 (0.61-1.31) | 0.5641  |
| high vs. low in Other/Unknown race | 0.98 (0.83-1.15) | 0.7764  | 1.47 (0.87-2.47) | 0.1501  | 0.49 (0.23-1.07) | 0.0724  | 1.11 (0.41-3.04) | 0.8325  |
| <b>Year</b>                        |                  |         |                  |         |                  |         |                  |         |
| Age                                | 1.04 (1.03-1.04) | <.0001  | 1.04 (1.03-1.05) | <.0001  | 1.06 (1.06-1.07) | <.0001  | 1.06 (1.05-1.07) | <.0001  |
| 2010-2012                          | Reference        |         | Reference        |         | Reference        |         | Reference        |         |
| 2013-2015                          | 2.58 (2.44-2.73) | <.0001  | 3.20 (2.90-3.52) | <.0001  | 3.06 (2.79-3.35) | <.0001  | 3.04 (2.61-3.54) | <.0001  |
| 2016                               | 3.79 (3.48-4.13) | <.0001  | 5.88 (5.15-6.71) | <.0001  | 5.26 (4.63-5.99) | <.0001  | 6.18 (4.93-7.75) | <.0001  |
| PSA                                | 0.98 (0.97-0.99) | 0.0048  | 1.01 (0.99-1.03) | 0.3919  | 0.97 (0.95-0.99) | 0.0108  | 1.00 (0.96-1.03) | 0.8627  |
| <b>Number of positive cores</b>    |                  |         |                  |         |                  |         |                  |         |
| 3 or more positive cores           | Reference        |         | Reference        |         | Reference        |         | Reference        |         |
| 2 or less positive cores           | 3.33 (3.14-3.54) | <.0001  | 3.40 (3.05-3.80) | <.0001  | 3.65 (3.29-4.05) | <.0001  | 3.44 (2.90-4.08) | <.0001  |
| Unknown                            | 1.20 (1.11-1.30) | <.0001  | 1.50 (1.30-1.72) | <.0001  | 1.67 (1.46-1.91) | <.0001  | 1.35 (1.04-1.74) | 0.0220  |
| <b>Insurance</b>                   |                  |         |                  |         |                  |         |                  |         |
| Insured                            | Reference        |         | Reference        |         | Reference        |         | Reference        |         |
| Medicaid                           | 0.77 (0.67-0.89) | 0.0005  | 1.25 (0.96-1.63) | 0.0964  | 0.79 (0.61-1.01) | 0.0585  | 1.23 (0.84-1.79) | 0.2944  |
| Uninsured                          | 1.16 (0.83-1.62) | 0.3896  | 4.17 (3.01-5.77) | <.0001  | 1.48 (1.03-2.12) | 0.0353  | 1.29 (0.61-2.72) | 0.5003  |
| Unknown                            | 1.77 (1.43-1.95) | <.0001  | 0.59 (0.52-0.68) | <.0001  | 1.25 (1.02-1.54) | 0.0283  | 3.17 (2.36-4.24) | <.0001  |
| SES: socioeconomic status          |                  |         |                  |         |                  |         |                  |         |
